# Supplementary material for: Leveraging PET to image folate receptor α therapy of an antibody-drug conjugate
Source: Springer Nature journal article supplement (doi:10.1186/s13550-018-0437-x), 2018-08-28

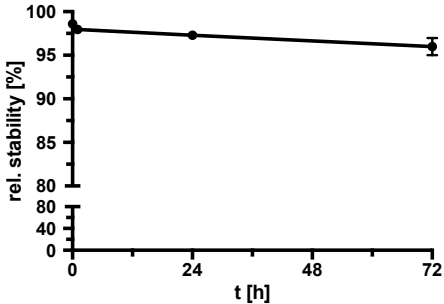

Supplement: MOESM3 [file 16078736]
