# Supplementary material for: Leveraging PET to image folate receptor α therapy of an antibody-drug conjugate
Source: Springer Nature journal article supplement (doi:10.1186/s13550-018-0437-x), 2018-08-28

M3 (4 h)

M3 (24 h)

M3 (48 h)

M3 (72 h)

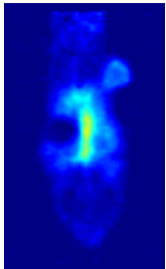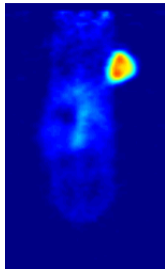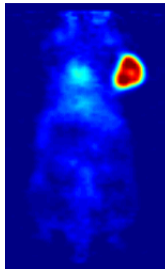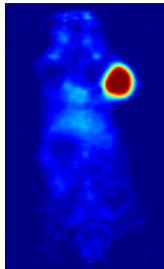

30

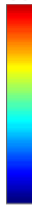

%ID/g

0

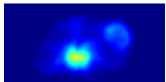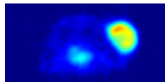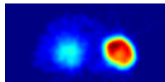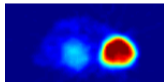

Max

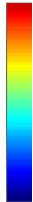

Min

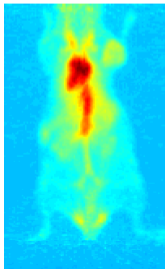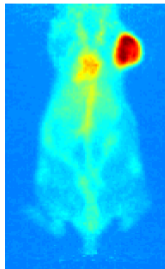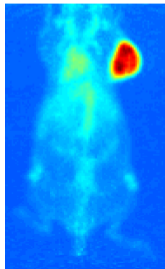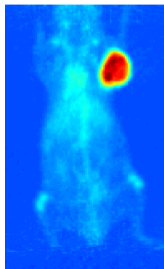

Supplement: MOESM4 [file 16078736]
